# Supplementary material
Source: Royal Society of Chemistry journal article supplement (doi:10.1039/d6fo00419a)
Supplement: d6fo00419a1.pdf [file d6fo00419a1.pdf]

### Supplementary Figure 1. subgroup analyses

RCT, randomized controlled trial(s). WMD, weighted mean difference. CI, confidence interval. SBP, systolic blood pressure. DBP, diastolic blood pressure.

#### Length of intervention (weeks)

## SBP

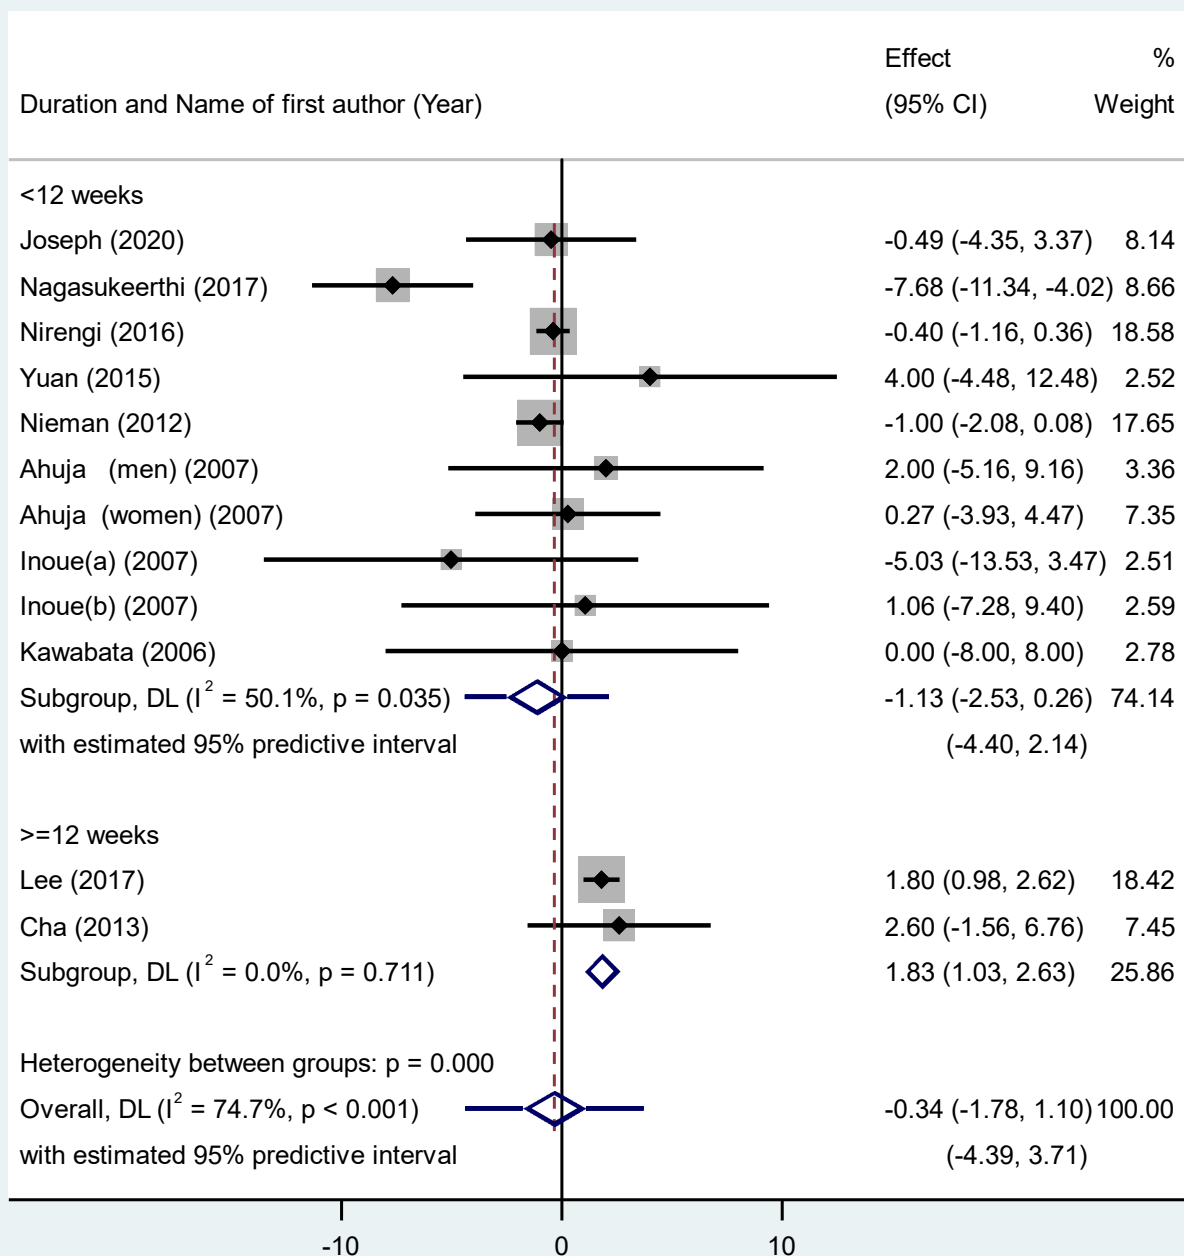

NOTE: Weights and between-subgroup heterogeneity test are from random-effects model

# DBP

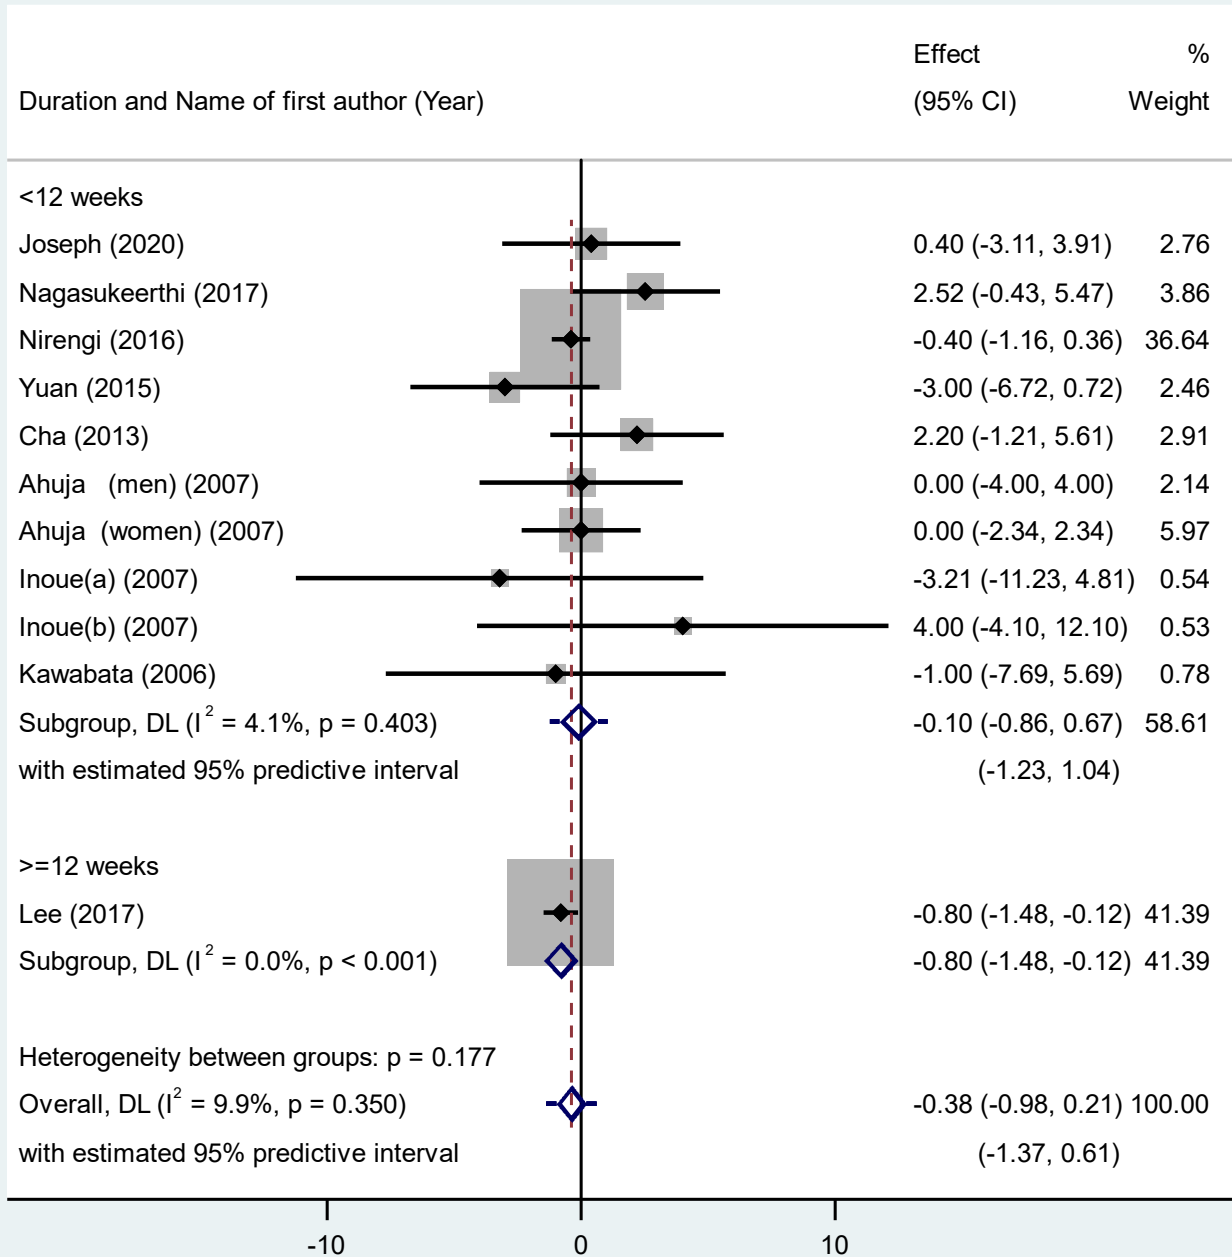

NOTE: Weights and between-subgroup heterogeneity test are from random-effects model

# Heart rate

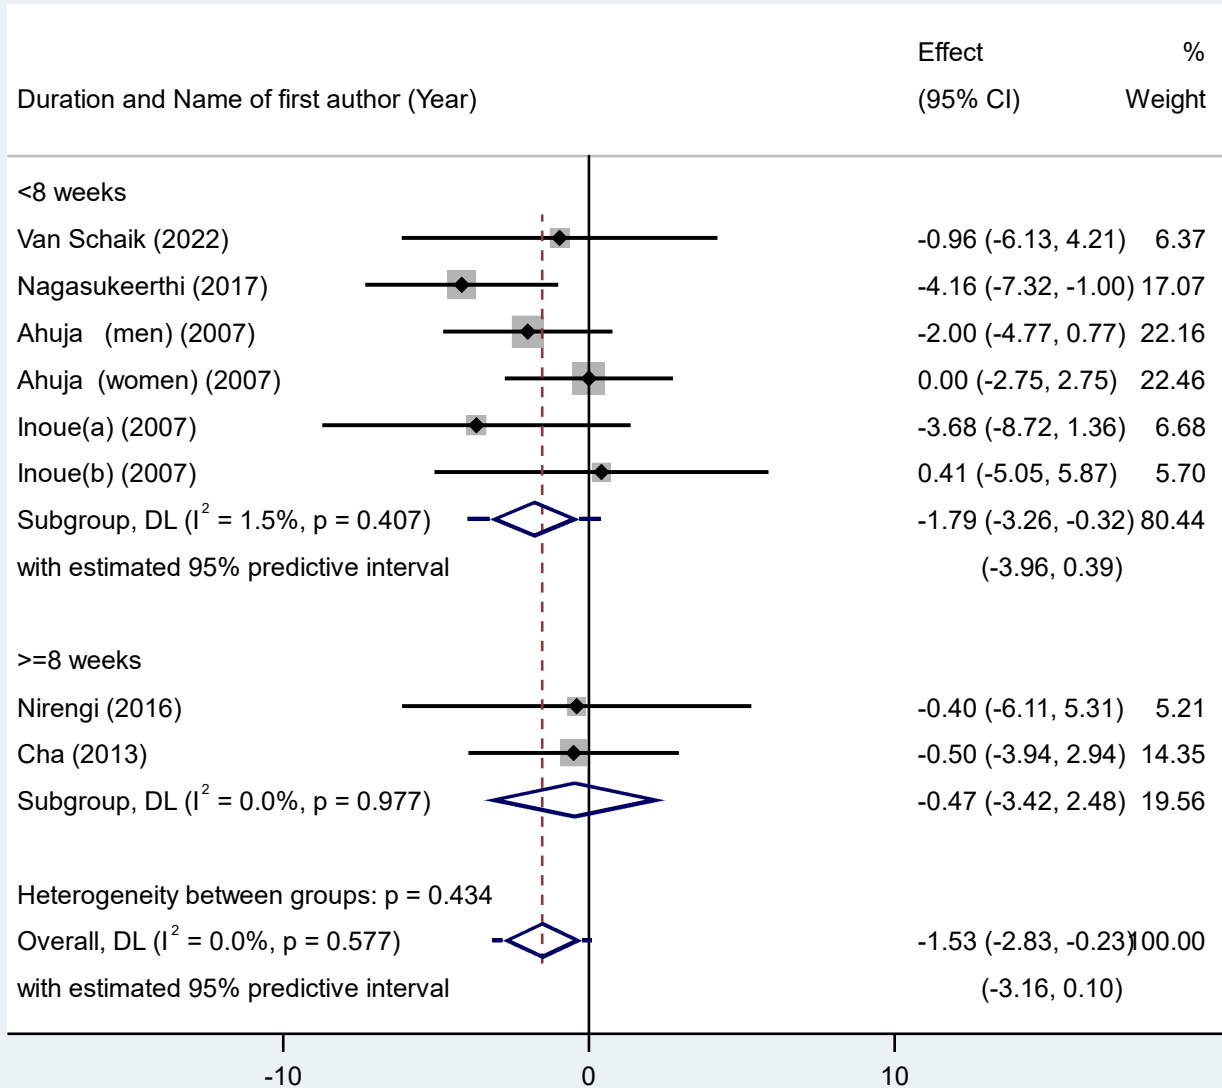

NOTE: Weights and between-subgroup heterogeneity test are from random-effects model

## 2) Daily dose of the capsaicin or capsinoids (mg/day)

# SBP

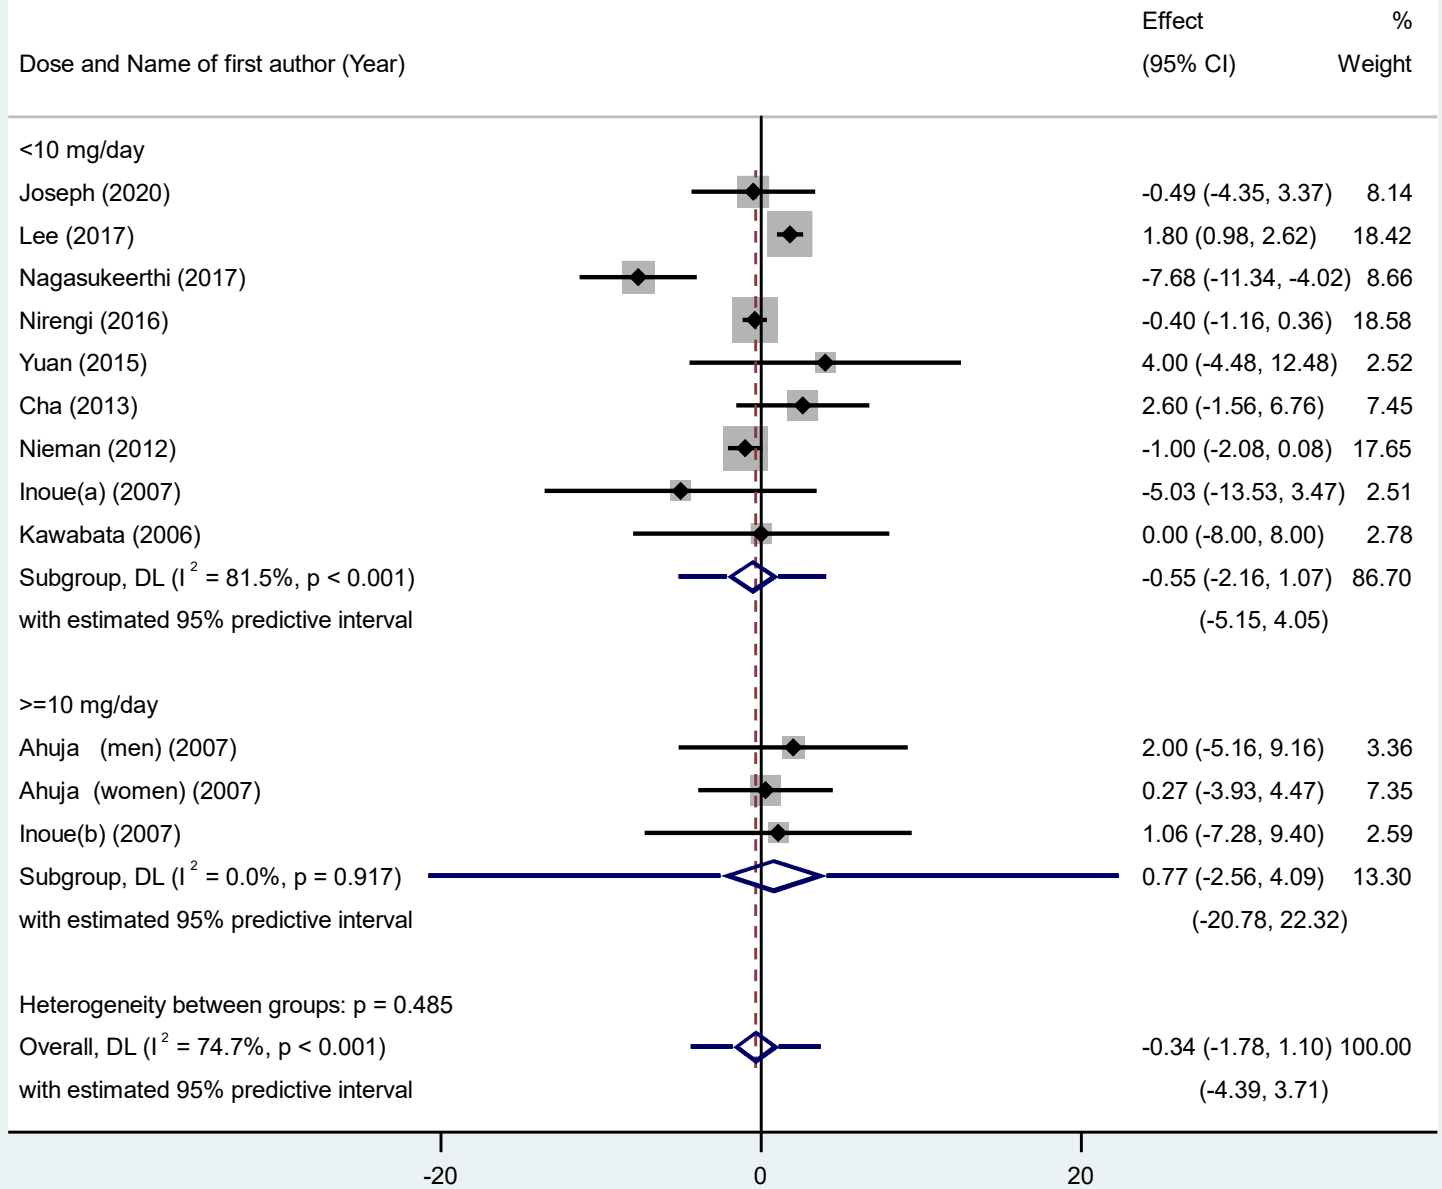

NOTE: Weights and between-subgroup heterogeneity test are from random-effects model

# DBP

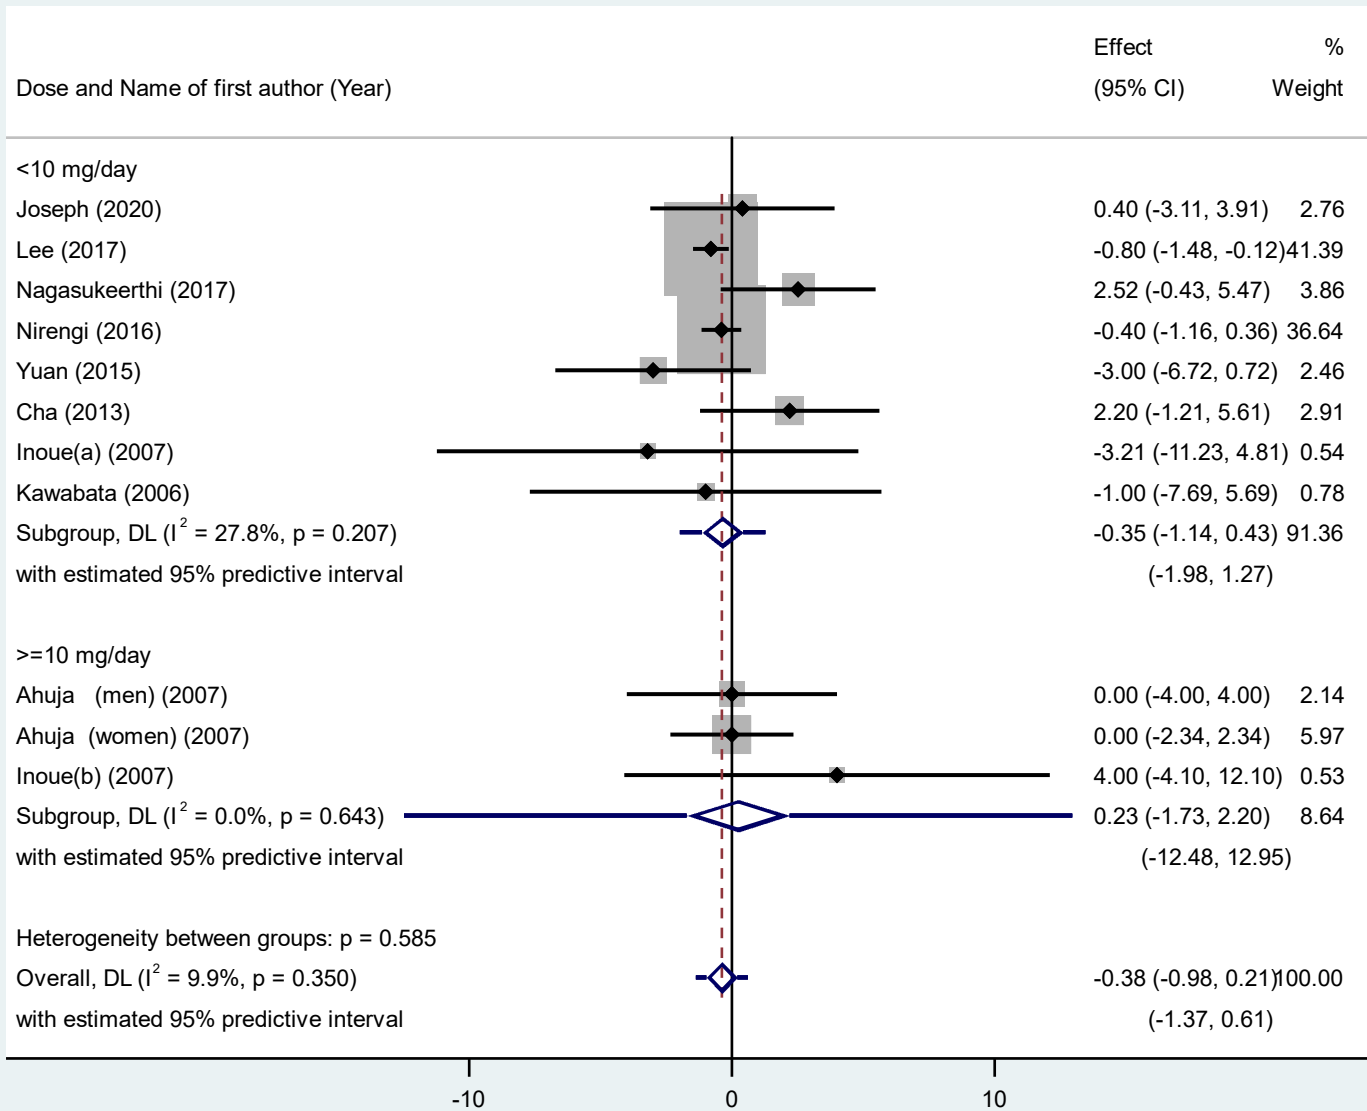

NOTE: Weights and between-subgroup heterogeneity test are from random-effects model

# Heart rate

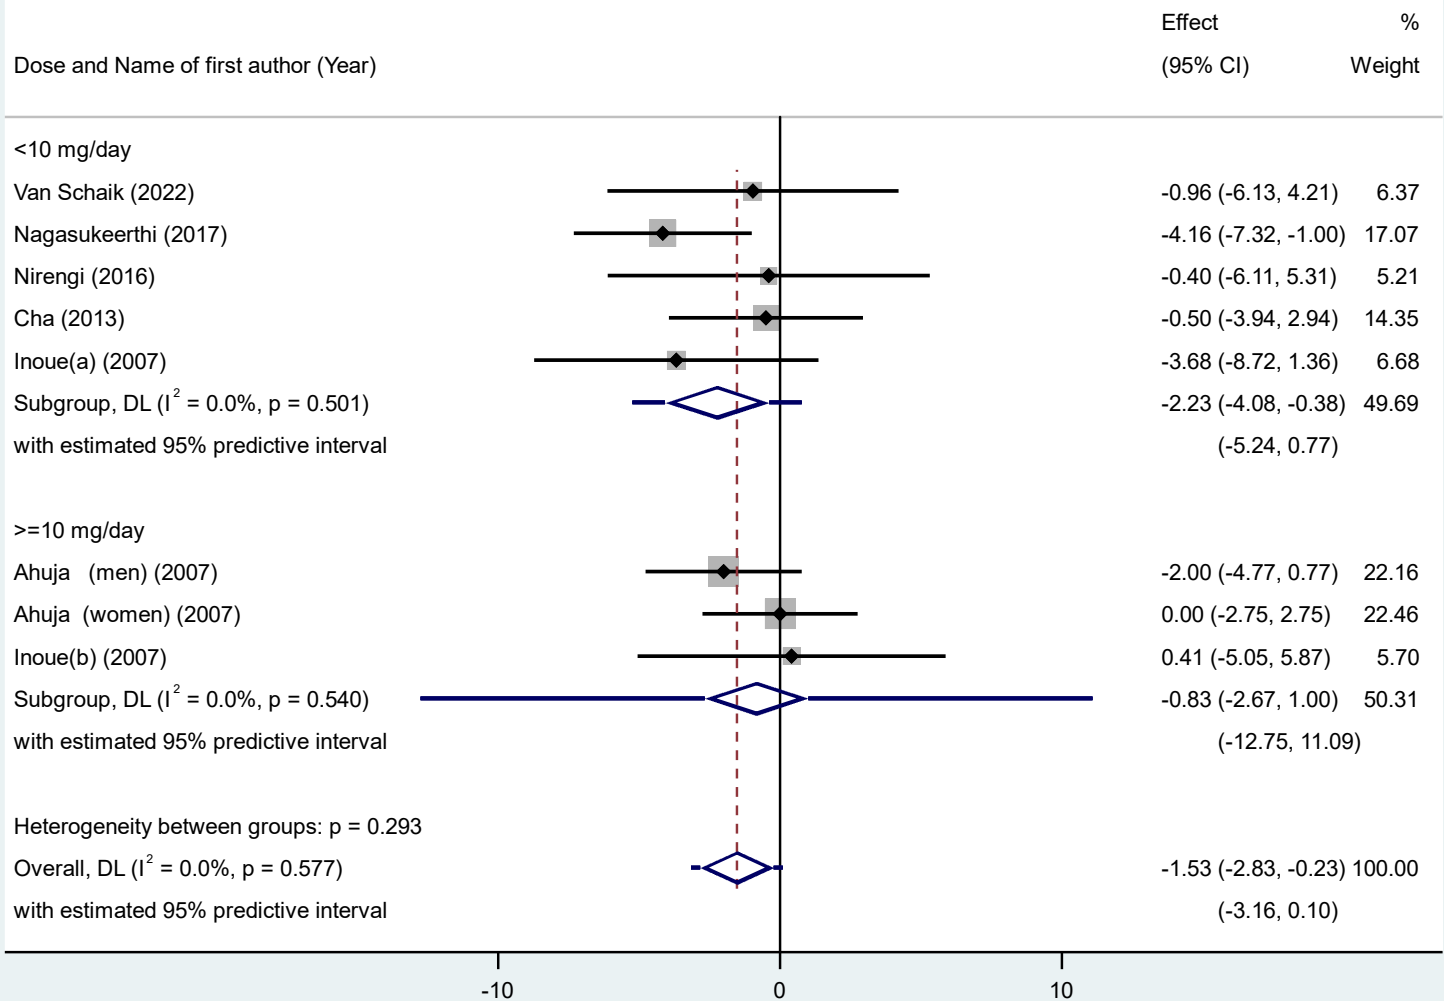

NOTE: Weights and between-subgroup heterogeneity test are from random-effects model

### 3) BMI at baseline (kg/m<sup>2</sup>)

# SBP

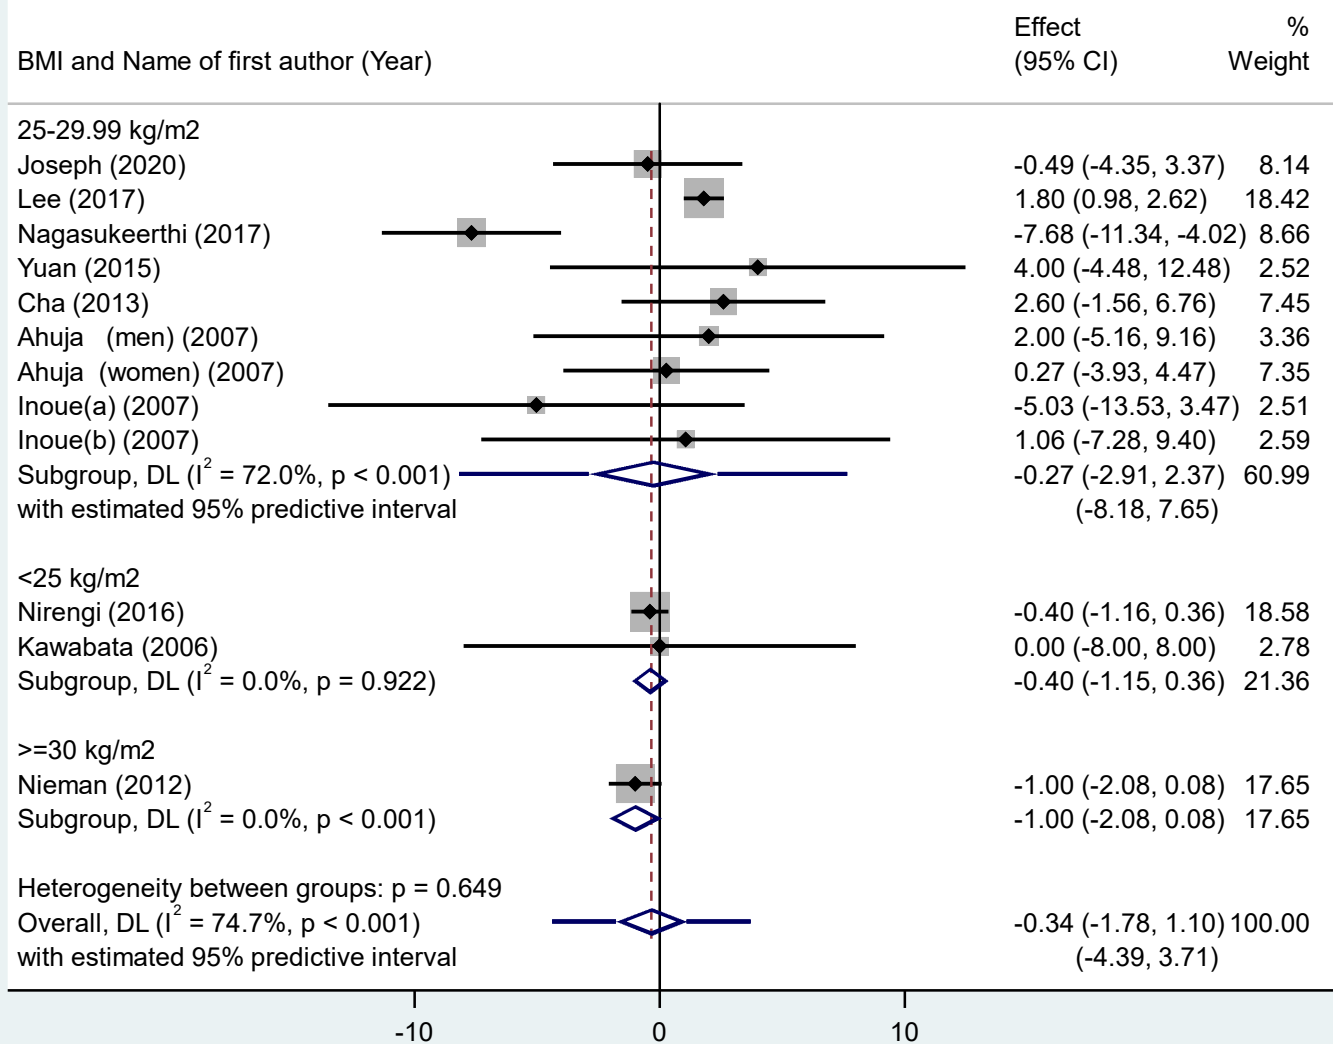

NOTE: Weights and between-subgroup heterogeneity test are from random-effects model

# DBP

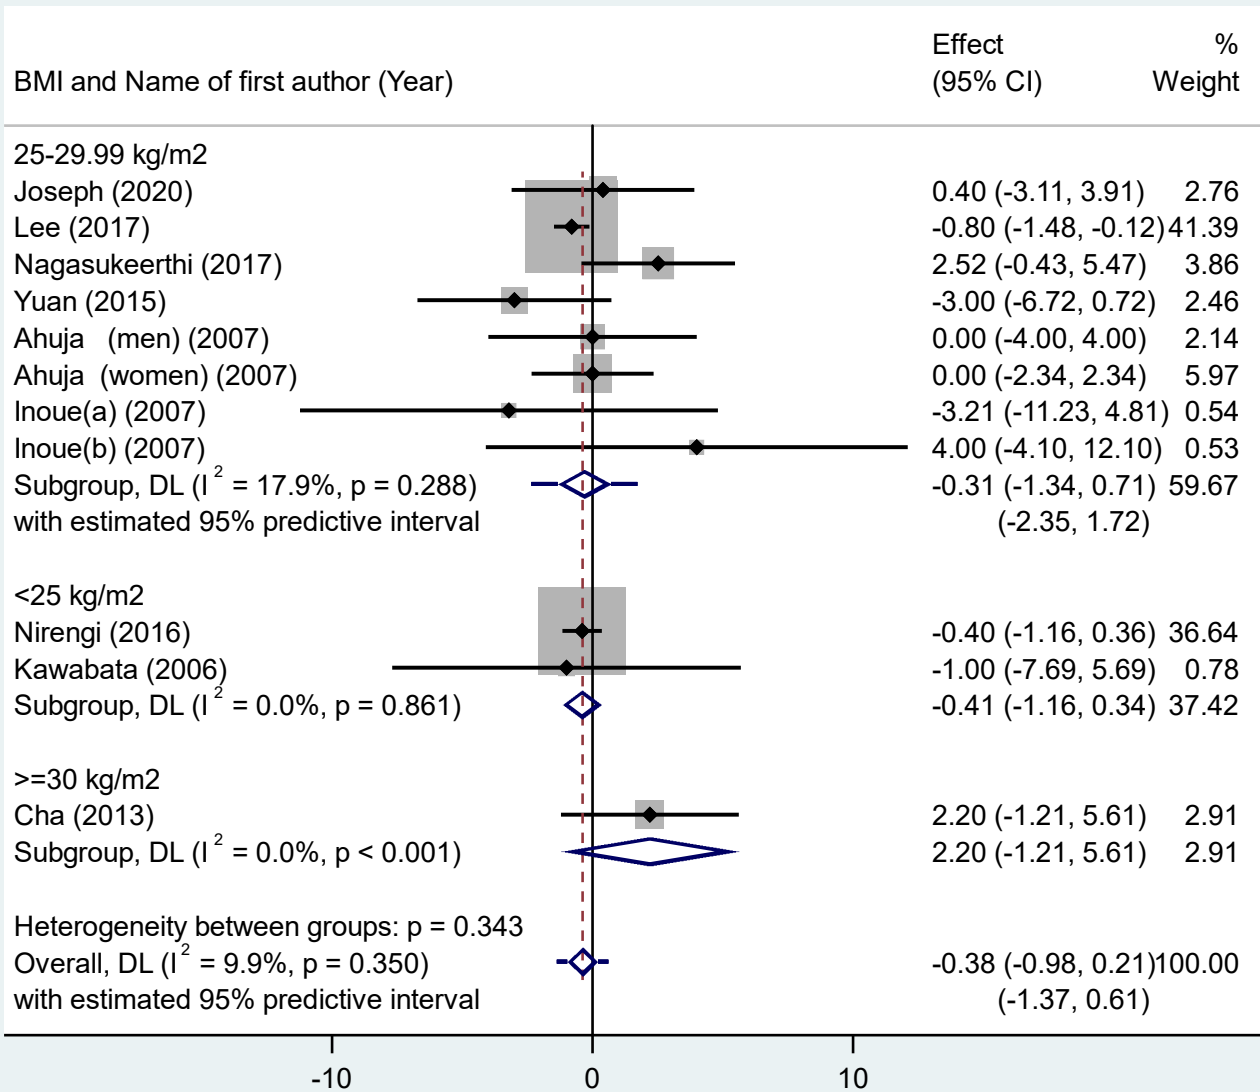

NOTE: Weights and between-subgroup heterogeneity test are from random-effects model

# Heart rate

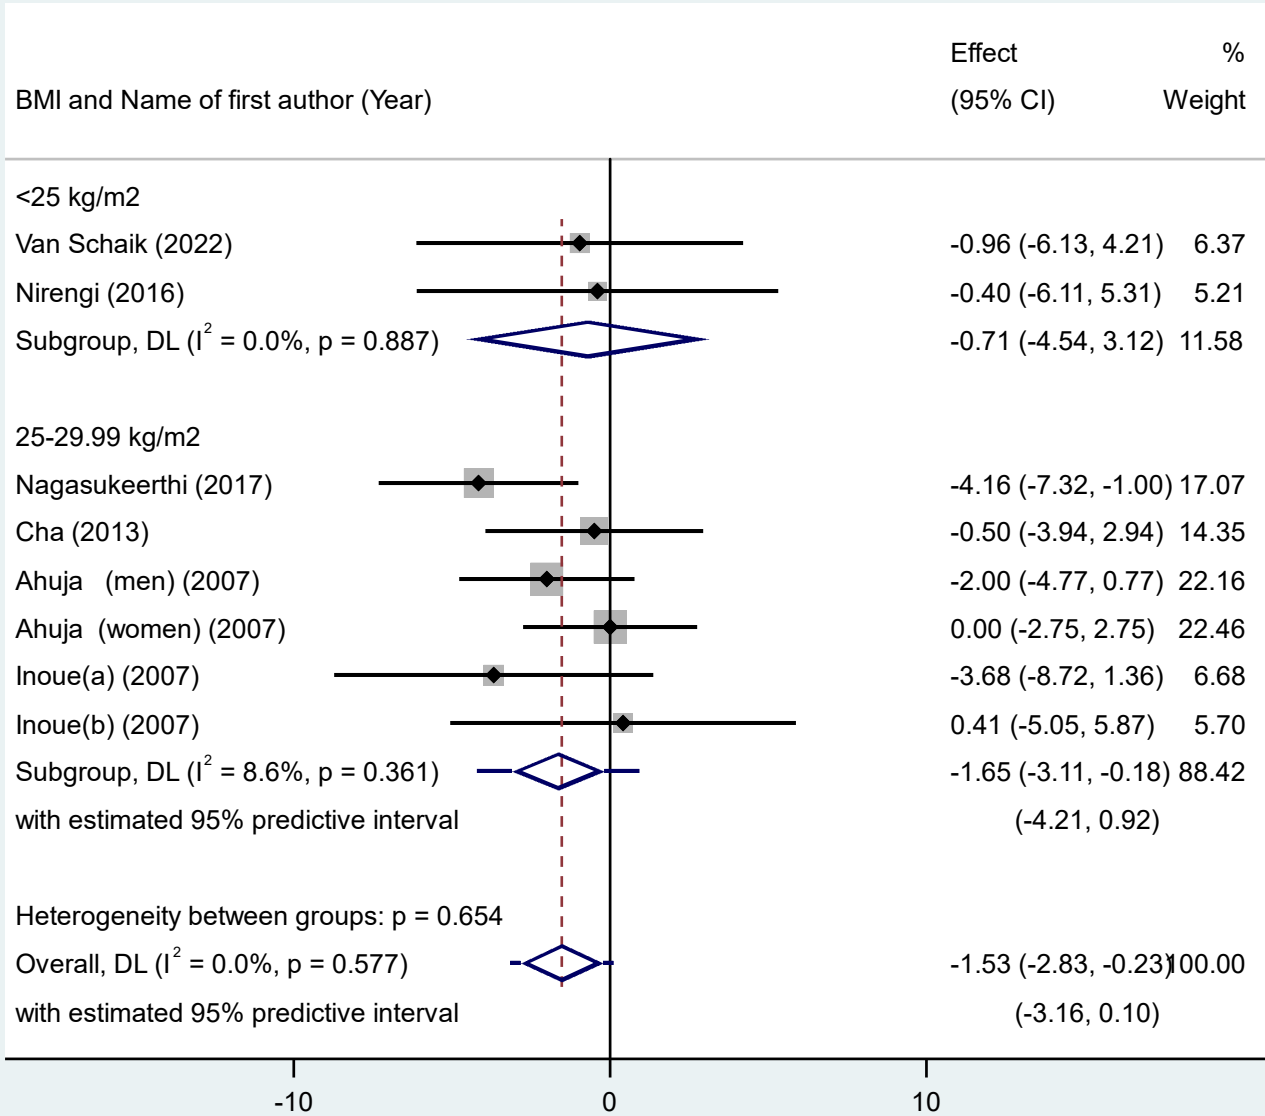

NOTE: Weights and between-subgroup heterogeneity test are from random-effects model

#### 4) Gender

## SBP

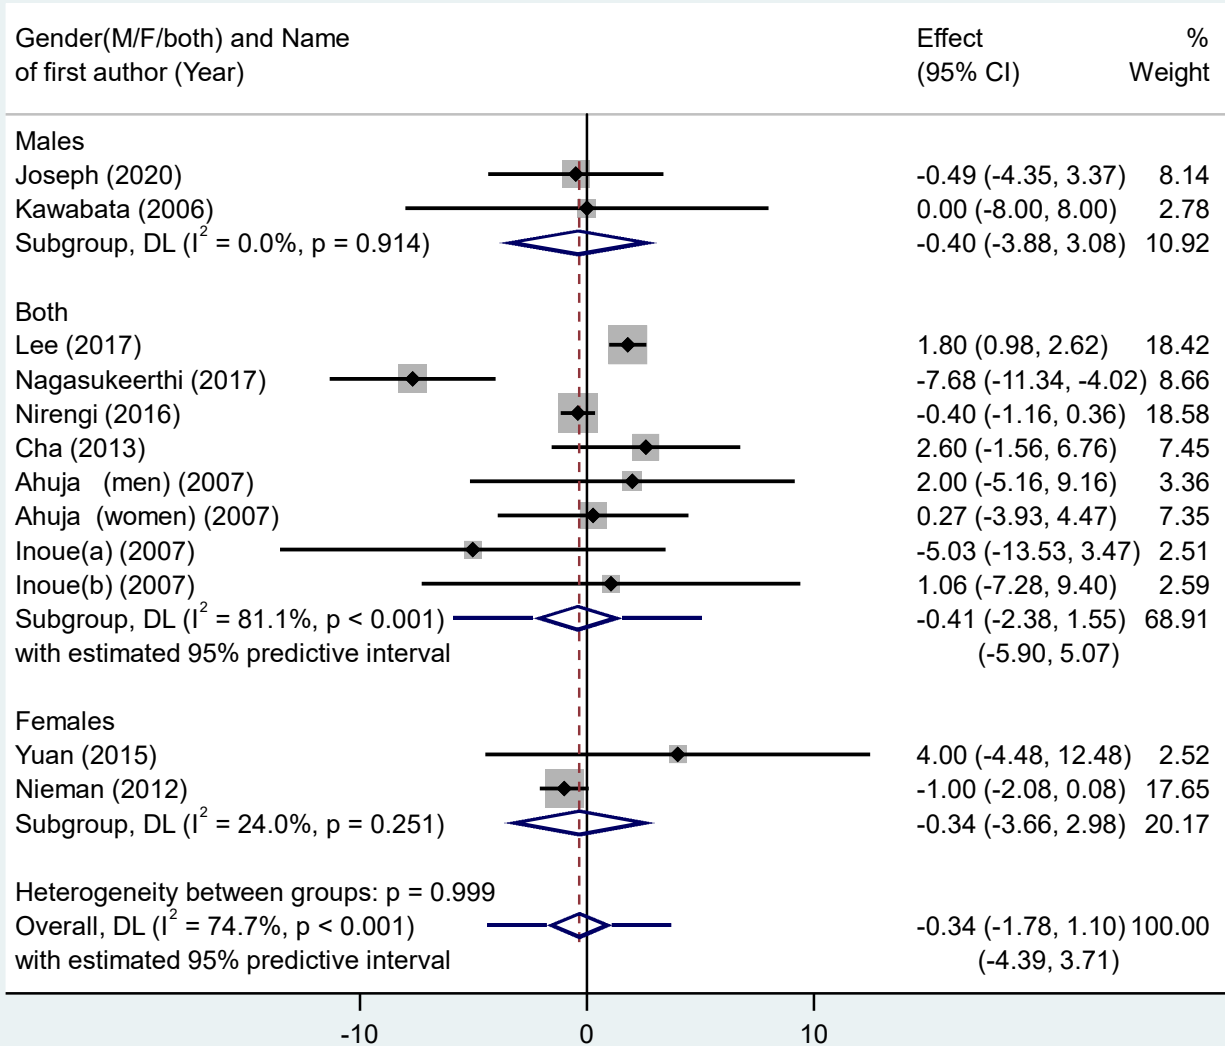

NOTE: Weights and between-subgroup heterogeneity test are from random-effects model

# DBP

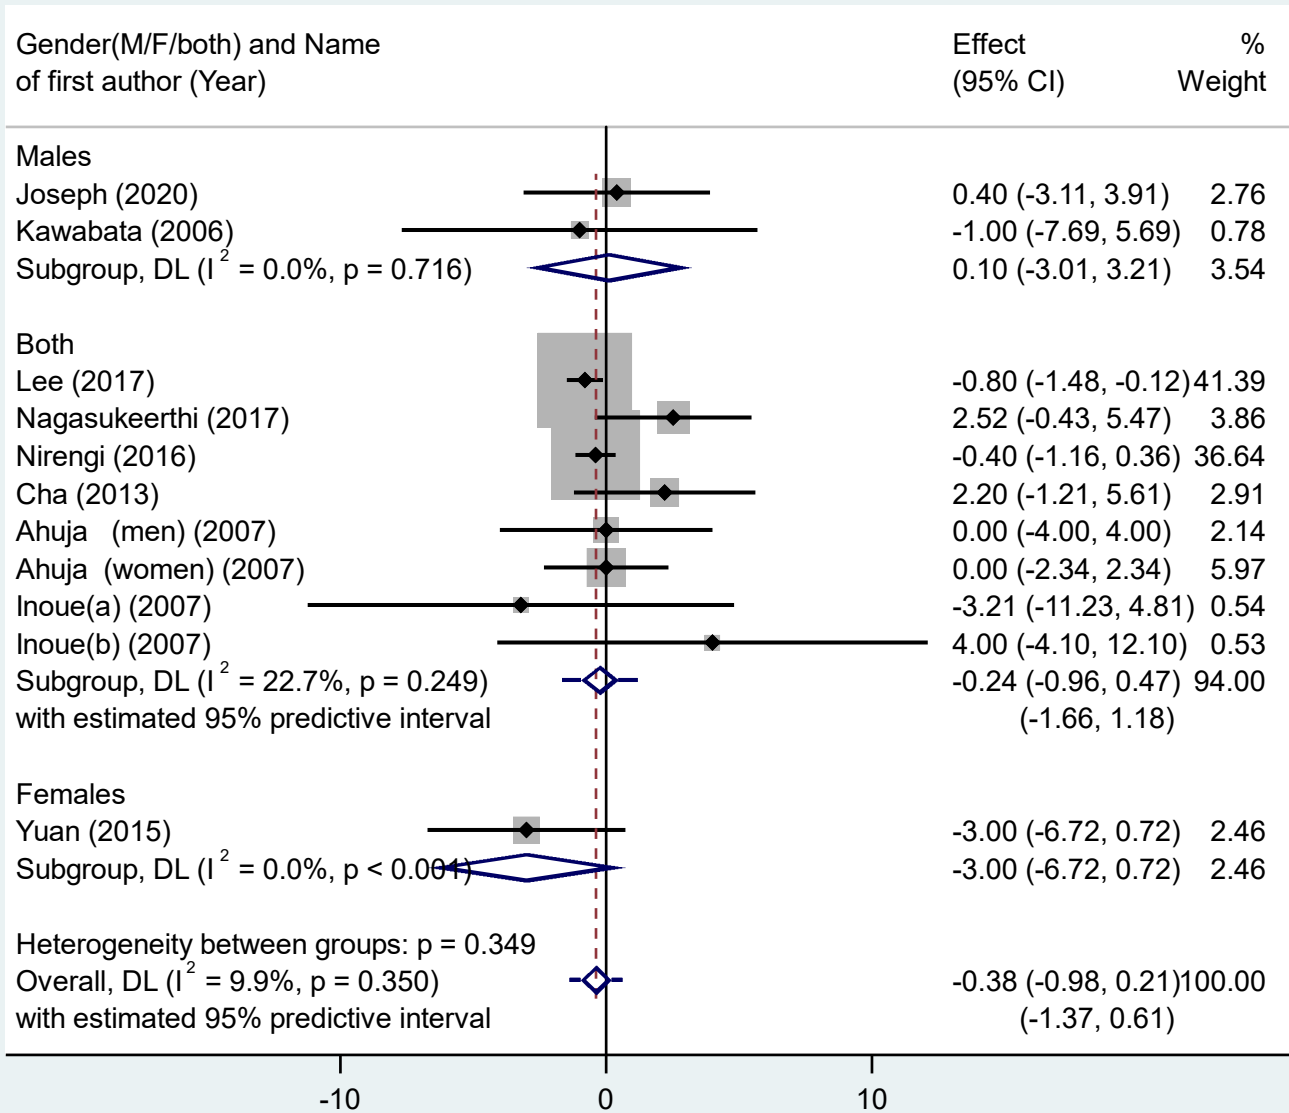

NOTE: Weights and between-subgroup heterogeneity test are from random-effects model

# Heart rate

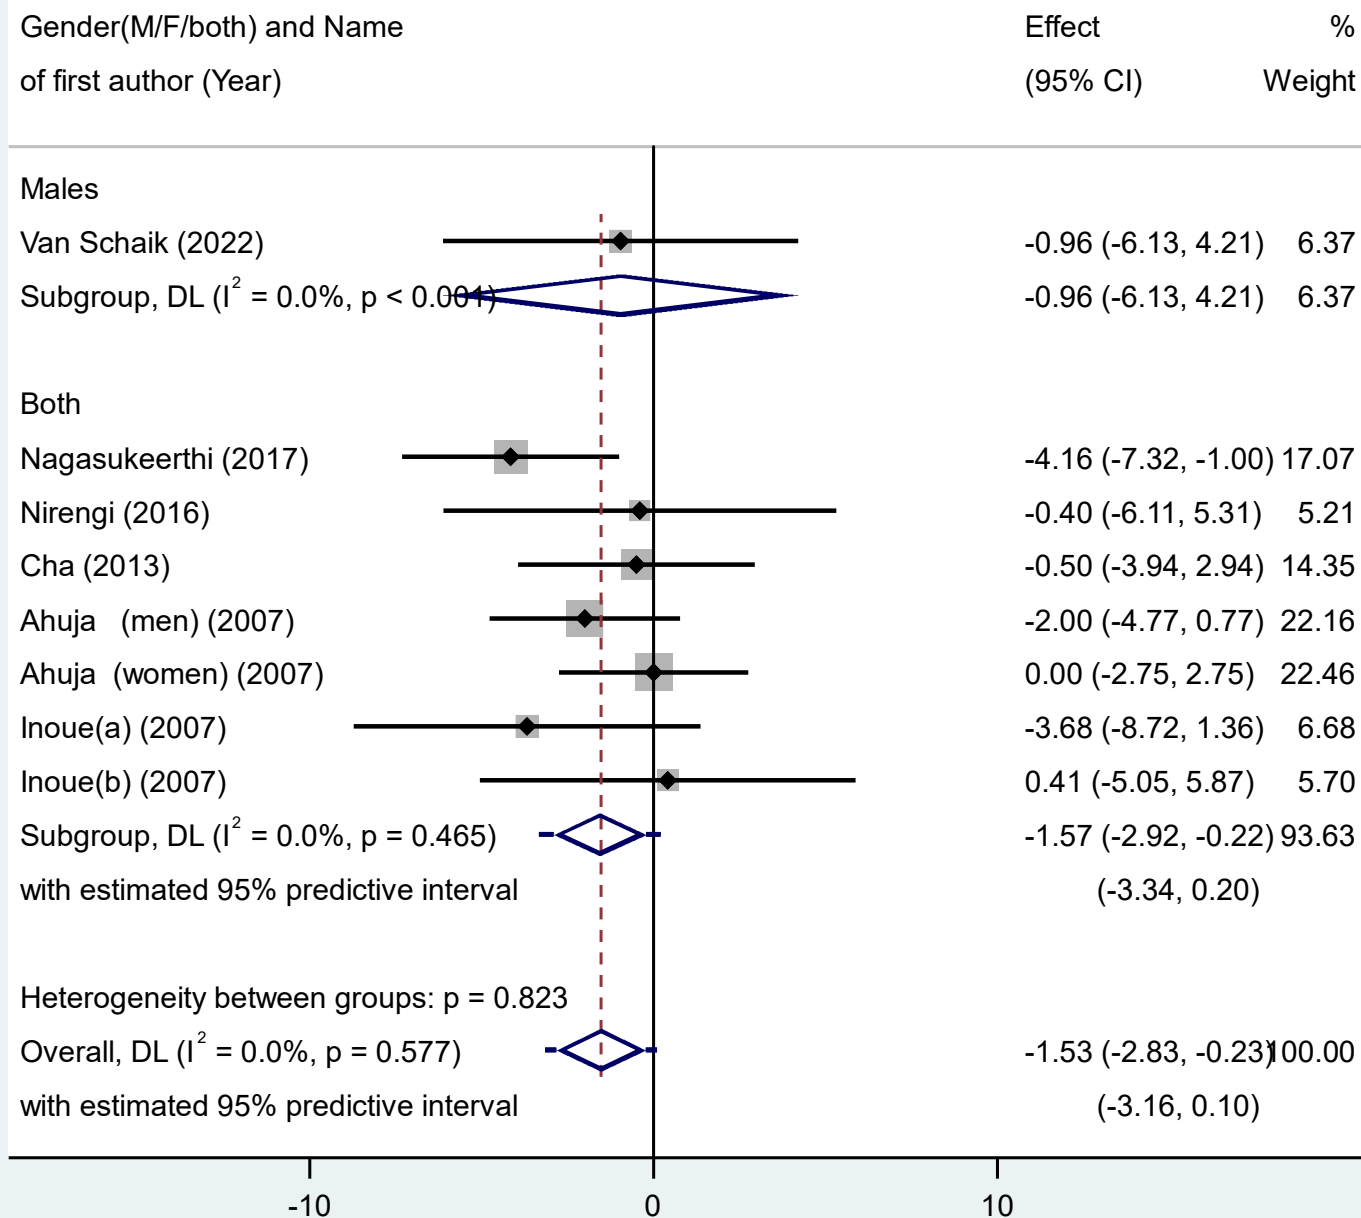

NOTE: Weights and between-subgroup heterogeneity test are from random-effects model

## 5) Type of intervention

# SBP

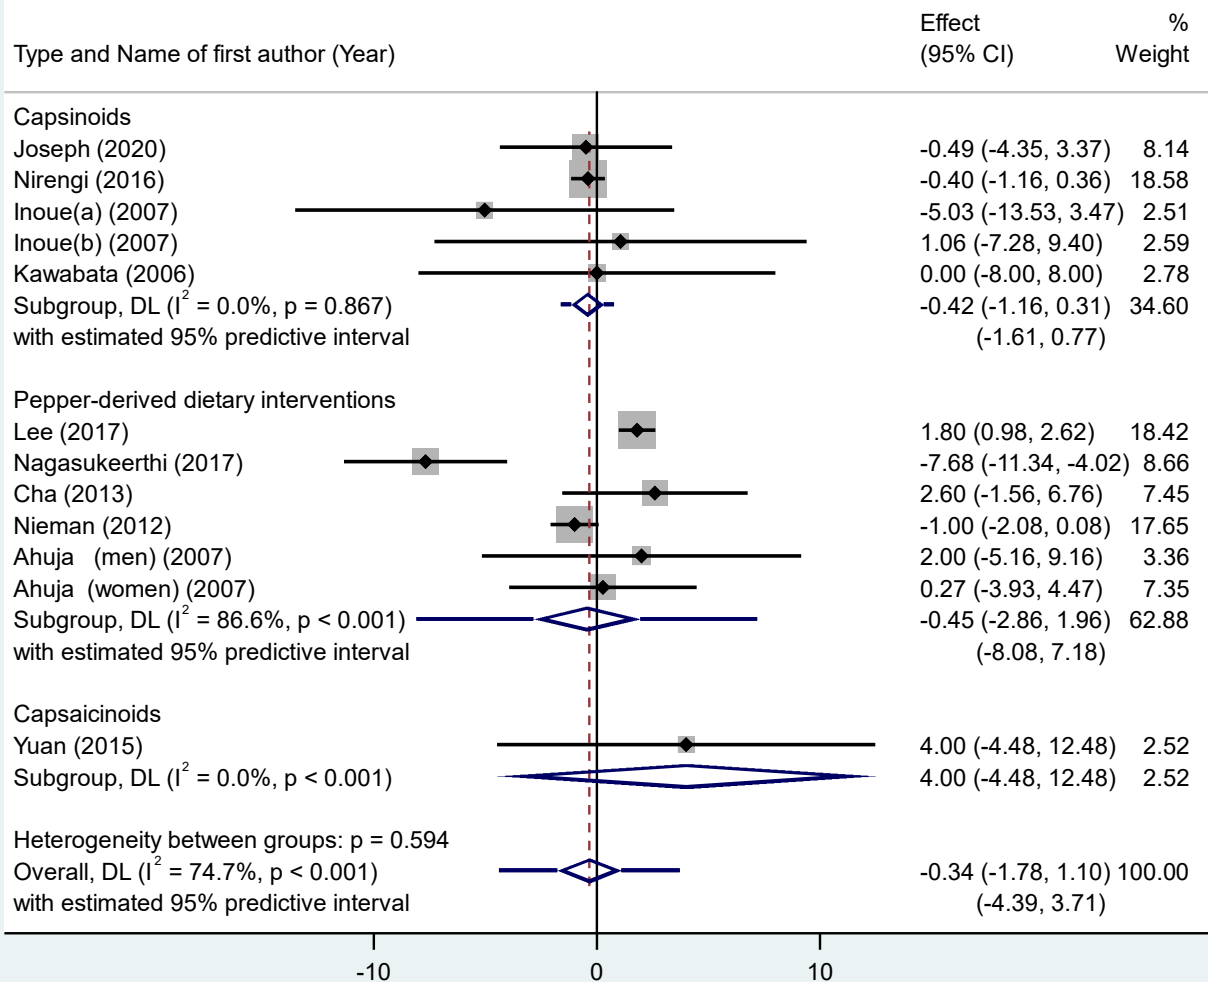

NOTE: Weights and between-subgroup heterogeneity test are from random-effects model

# DBP

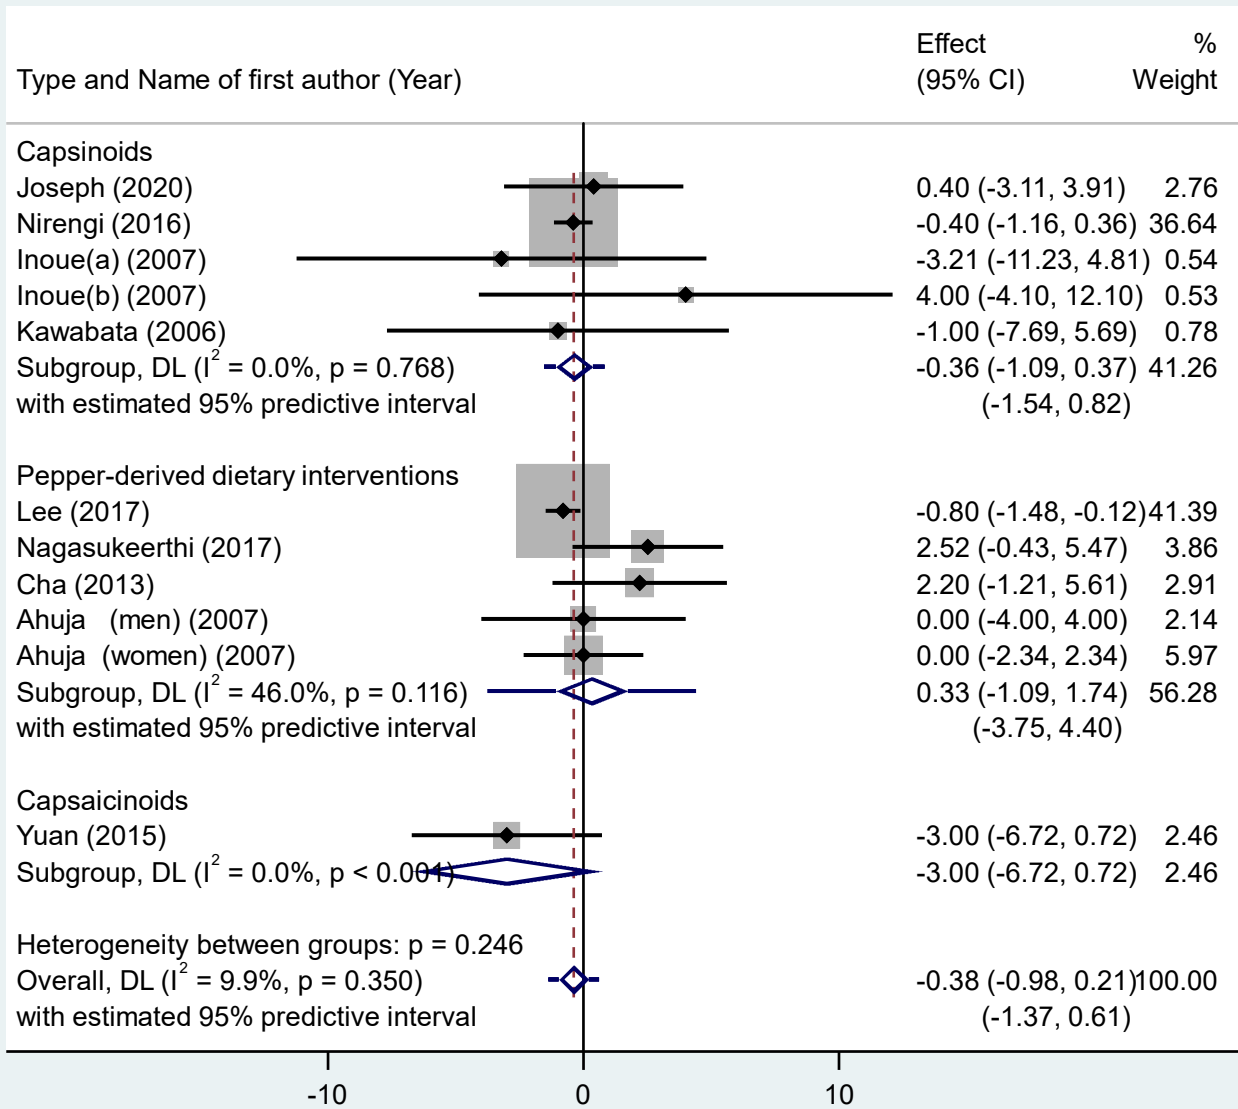

NOTE: Weights and between-subgroup heterogeneity test are from random-effects model

# Heart rate

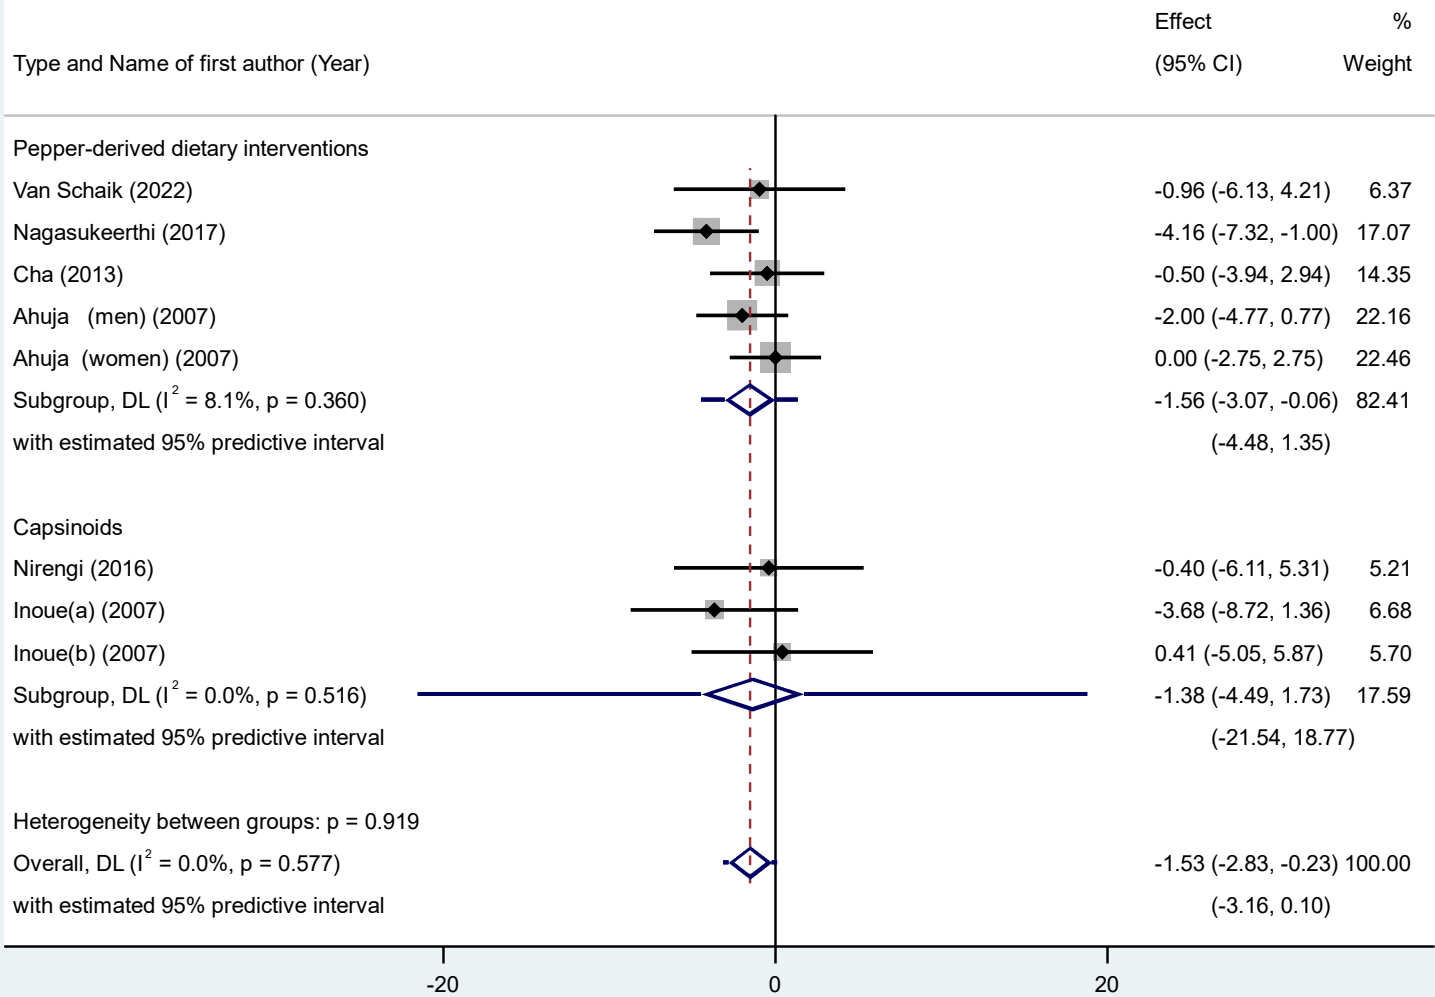

NOTE: Weights and between-subgroup heterogeneity test are from random-effects model
