# Supplementary material
Source: Royal Society of Chemistry journal article supplement (doi:10.1039/d6fo00419a)

### Supplementary Figure 2. Short-Term Effects of Single-Dose

SBP, systolic blood pressure. DBP, diastolic blood pressure. CI, confidence interval.

#### A) SBP

## SBP

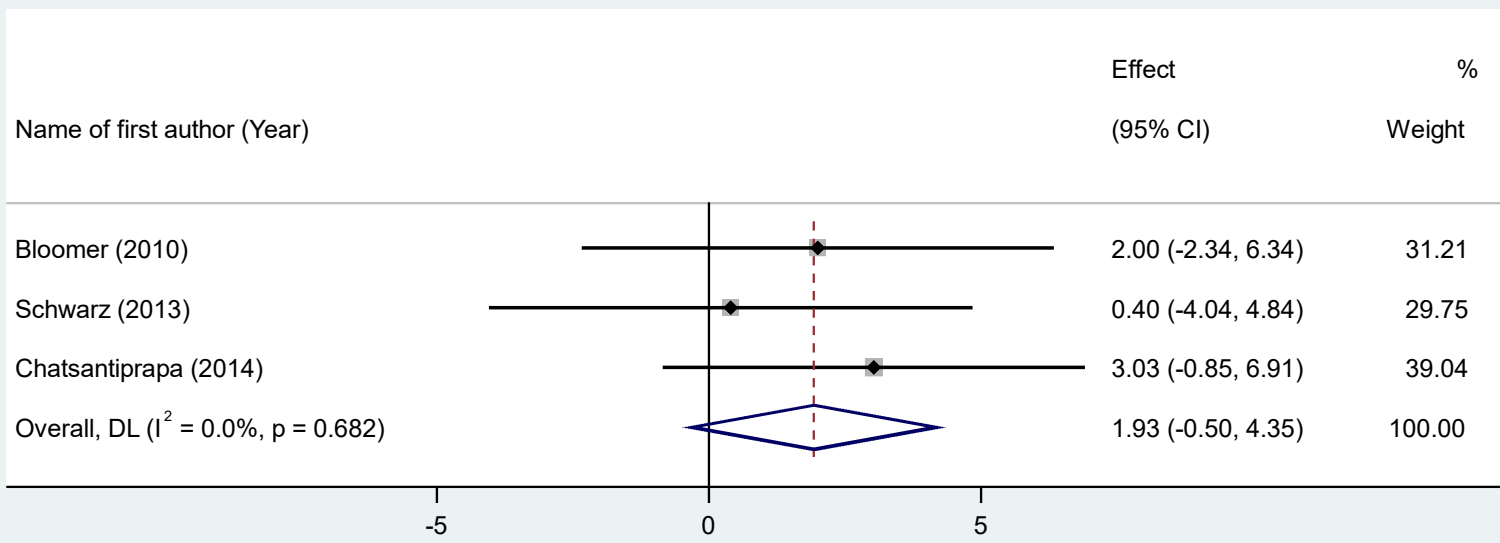

#### B) DBP

## DBP

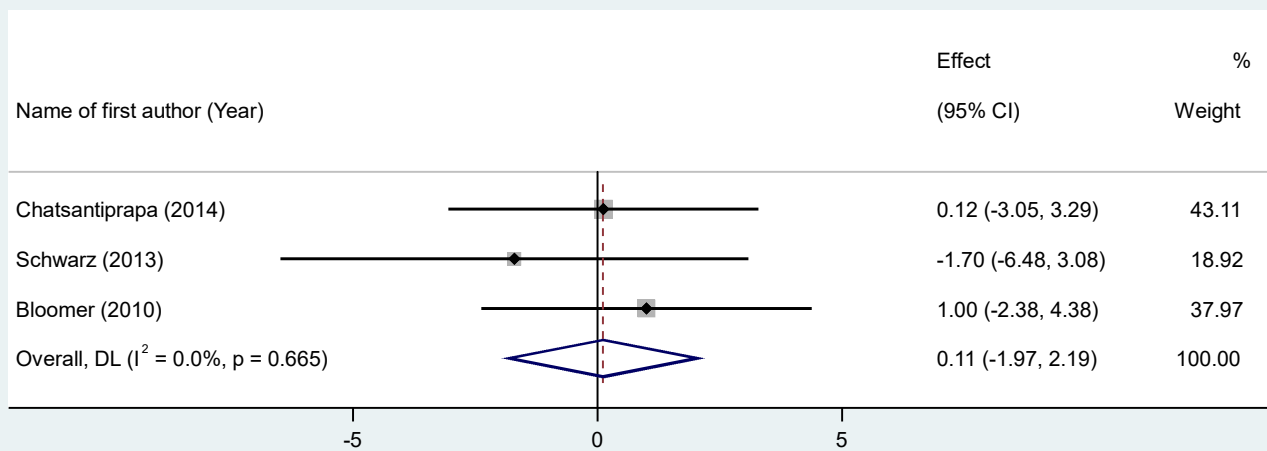

### C) Heart (pulse ) rate (BPM)

## Heart rate

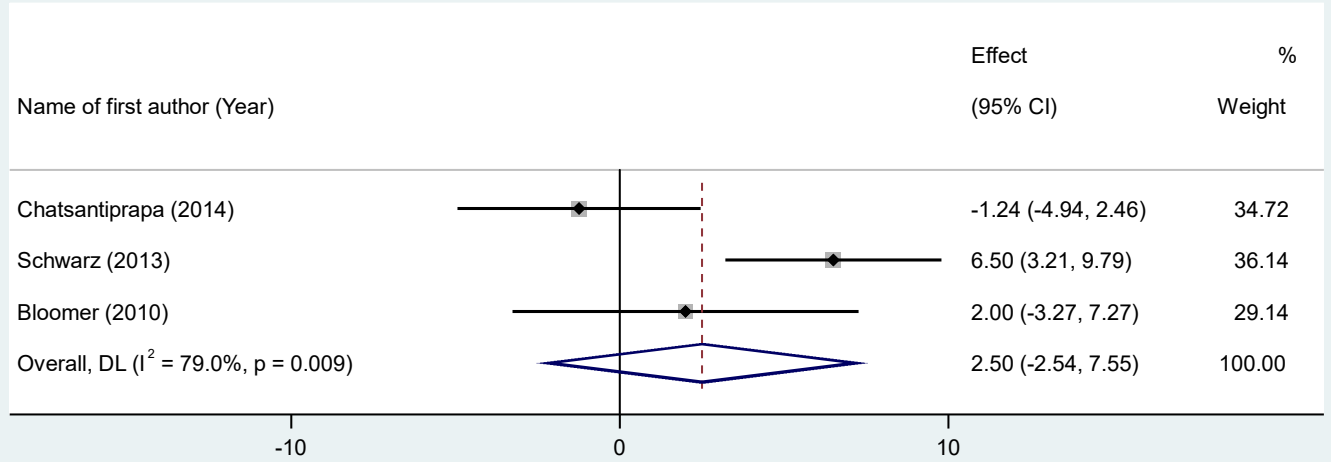

Supplement: d6fo00419a2.pdf [file d6fo00419a2.pdf]
