# Supplementary material
Source: Royal Society of Chemistry journal article supplement (doi:10.1039/d6fo00419a)

**Supplementary Figure 3.** Meta regression analysis.

A) SBP (mmHg) = Treatment duration (Coef. = 0.43,  $p = 0.005$ ); Dose (Coef. = 0.106,  $p = 0.306$ ); BMI (Coef. = -0.090,  $p = 0.737$ )

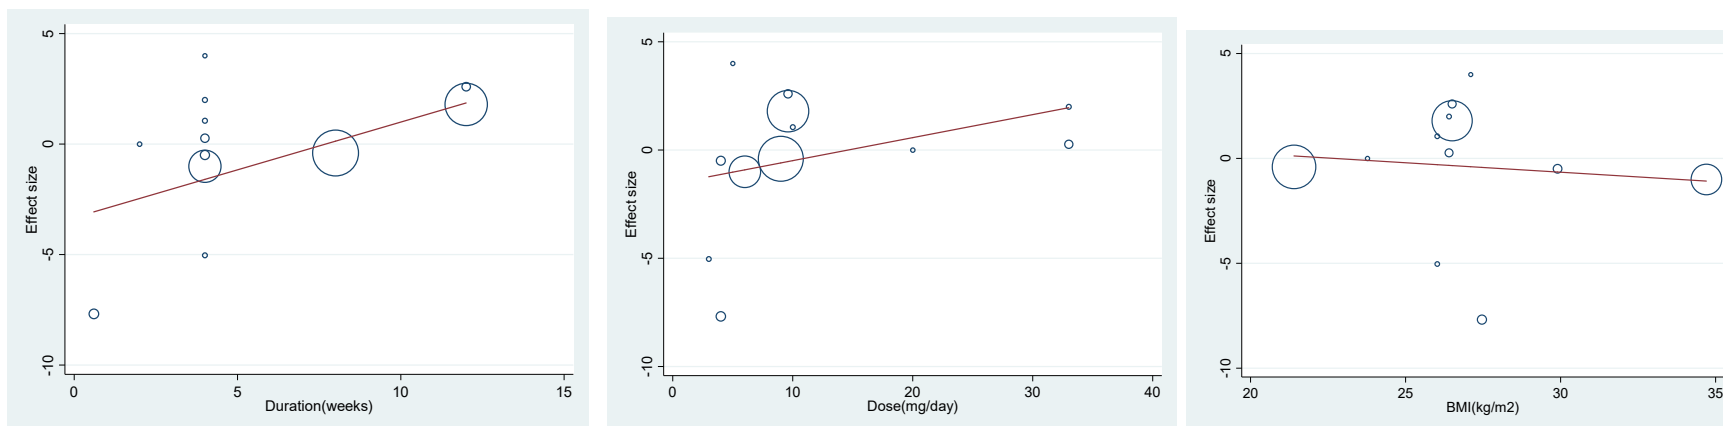

B) DBP (mmHg) = Treatment duration (Coef. = -0.11,  $p = 0.220$ ); Dose (Coef. = -0.019,  $p = 0.812$ ); BMI (Coef. = 0.088,  $p = 0.637$ )

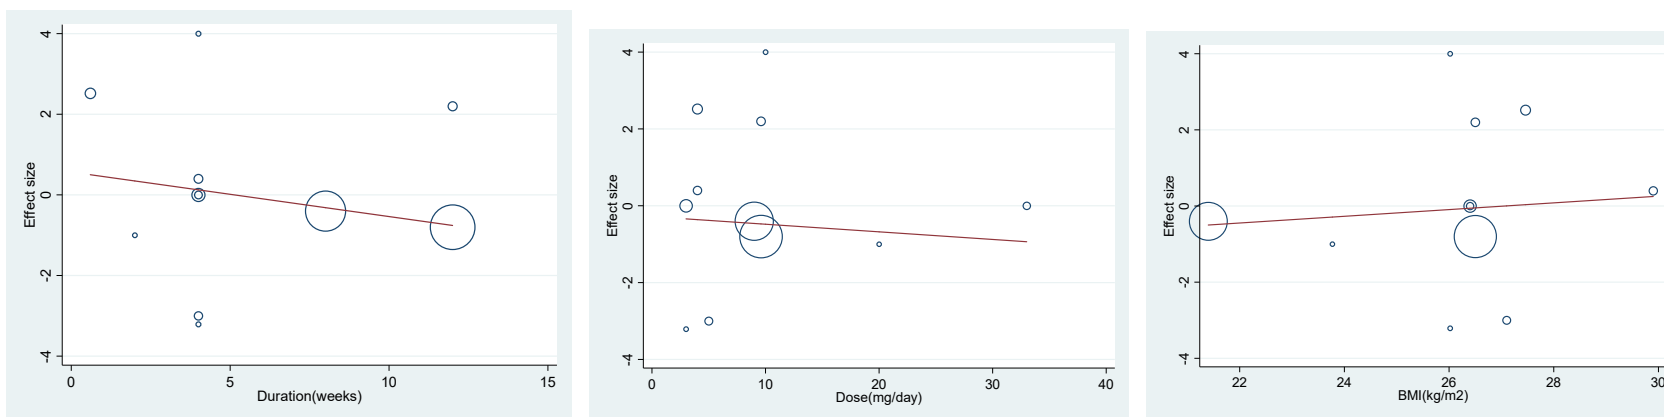

C) Heart Rate (**BPM**)= Treatment duration (Coef. = 0.27, p = 0.102); Dose (Coef. = 0.031, p = 0.593); BMI (Coef. = -0.26, p = 0.145)

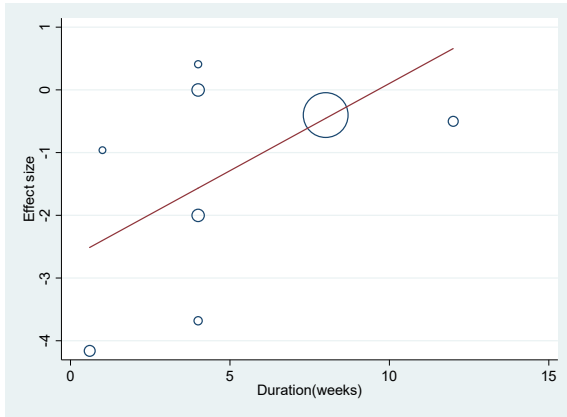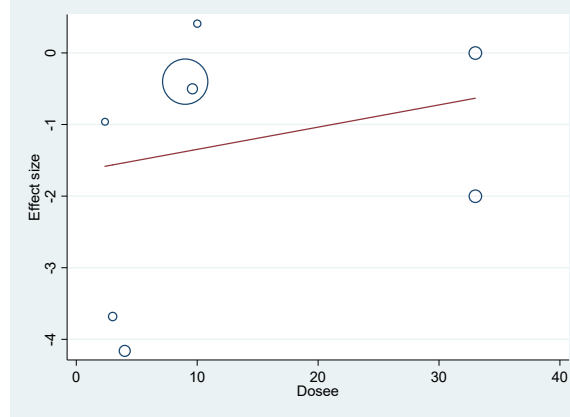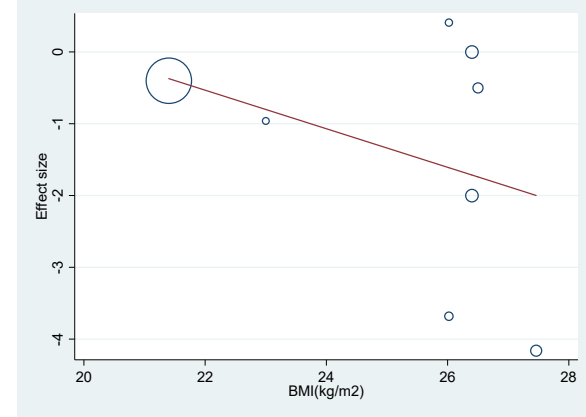

Supplement: d6fo00419a3.pdf [file d6fo00419a3.pdf]
