# Supplementary material
Source: Royal Society of Chemistry journal article supplement (doi:10.1039/d6fo00419a)
Supplement: d6fo00419a5.pdf [file d6fo00419a5.pdf]

**Supplementary Table 1.** Search strategy.

| PubMed/MEDLINE(n:912)                                                                                                                                                                                                                                                                                                                                                                                                                                                      | Scopus(n:2398)                                                                                                                                                                                                                                                                                                                                                                                                                                                                                                                                                                                                     | Web of Science(n:1600)                                                                                                                                                                                                                                                                                                                   | EMBASE(n:1341)                                                                                                                                                                                                                                                                                                                                                                                                                                                                                                                                                                          |
|----------------------------------------------------------------------------------------------------------------------------------------------------------------------------------------------------------------------------------------------------------------------------------------------------------------------------------------------------------------------------------------------------------------------------------------------------------------------------|--------------------------------------------------------------------------------------------------------------------------------------------------------------------------------------------------------------------------------------------------------------------------------------------------------------------------------------------------------------------------------------------------------------------------------------------------------------------------------------------------------------------------------------------------------------------------------------------------------------------|------------------------------------------------------------------------------------------------------------------------------------------------------------------------------------------------------------------------------------------------------------------------------------------------------------------------------------------|-----------------------------------------------------------------------------------------------------------------------------------------------------------------------------------------------------------------------------------------------------------------------------------------------------------------------------------------------------------------------------------------------------------------------------------------------------------------------------------------------------------------------------------------------------------------------------------------|
| ((((((((((((((((((Capsicum[MeSH Terms]) OR (capsiate[tiab])) OR (Capsicum[tiab])) OR (Qutenza[tiab])) OR (Cayenne[tiab])) OR ("Hot Peppers"[tiab])) OR ("Hot Pepper"[tiab])) OR (Pimiento[tiab])) OR ("Chilli Peppers"[tiab])) OR (chili[tiab])) OR (Chilli[tiab])) OR ("Chilli Pepper"[tiab])) OR (capsaicinoid[tiab])) OR ("Red Peppers"[tiab])) OR ("Red Pepper"[tiab])) OR (capsaicin[tiab])) OR (capsaicin[MeSH Terms])) OR (paprika[tiab])) OR (paprika[MeSH Terms]) | (TITLE-ABS-KEY ((Capsicum) OR (capsiate) OR (Capsicum) OR (Qutenza) OR (Cayenne) OR ("Hot Peppers") OR ("Hot Pepper") OR (Pimiento) OR ("Chilli Peppers") OR (chili) OR (Chilli) OR ("Chilli Pepper") OR (capsaicinoid) OR ("Red Peppers") OR ("Red Pepper") OR (capsaicin) OR (paprika) ) AND TITLE-ABS-KEY ( "Clinical Trials" OR "Clinical Trial" OR "Cross-Over Studies" OR "Double-Blind Method" OR "Single-Blind Method" OR "Random Allocation" OR ret OR random OR randomly OR placebo OR assignment OR "Intervention Studies" OR intervention OR "controlled trial" OR randomized OR trial OR randomised)) | TS=(capsiate OR capsicum OR qutenza OR cayenne OR "hot pepper*" OR pimiento OR "chilli pepper*" OR chili OR chilli OR capsaicinoid* OR "red pepper*" OR paprika OR capsaicin) AND TS=(random* OR placebo* OR "clinical trial*" OR "controlled trial*" OR "randomized controlled trial" OR crossover OR "double blind" OR "single blind") | ((((((((((((((((((exp capsicum/) OR (exp capsacin/) OR (exp paprika/) OR (capsiate.ti,ab.) OR (capsicum.ti,ab.) OR (qutenza.ti,ab.) OR (cayenne.ti,ab.) OR ("hot pepper*".ti,ab.) OR (pimiento.ti,ab.) OR ("chilli pepper*".ti,ab.) OR (chili.ti,ab.) OR (chilli.ti,ab.) OR (capsaicinoid*.ti,ab.) OR ("red pepper*".ti,ab.) OR (paprika.ti,ab.) OR (capsaicin.ti,ab.) AND ((((((((((((((((((randomized controlled trial/) OR (controlled clinical trial/) OR (crossover procedure/) OR (double blind procedure/) OR (single blind procedure/) OR (random*.ti,ab.) OR (placebo*.ti,ab.) |

|  |  |  |                                                           |
|--|--|--|-----------------------------------------------------------|
|  |  |  | OR ((clinical adj2<br>trial*).ti,ab.)) OR<br>(trial.ti.)) |
|--|--|--|-----------------------------------------------------------|
