# Supplementary material
Source: Royal Society of Chemistry journal article supplement (doi:10.1039/d6fo00419a)
Supplement: d6fo00419a6.pdf [file d6fo00419a6.pdf]

**Supplementary Table 2:** Reasons for Exclusion of Studies Following Full-Text Screening

| Reason for exclusion         | Article(citations) |
|------------------------------|--------------------|
| Review Articles              | (1-5)              |
| Didn't have a control group  | (6-8)              |
| Included no data of interest | (9-52)             |

1. Elmas C, Gezer C. Capsaicin and Its Effects on Body Weight. *Journal of the American Nutrition Association*. 2022;41(8):831–9.
2. Ludy MJ, Mattes RD. The effects of hedonically acceptable red pepper doses on thermogenesis and appetite. *Physiology & behavior*. 2011;102(3-4):251–8.
3. Hayman M, Kam PCA. Capsaicin: A review of its pharmacology and clinical applications. *Curr Anaesth Crit Care*. 2008;19(5-6):338–43.
4. Panchal SK, Bliss E, Brown L. Capsaicin in Metabolic Syndrome. *Nutrients*. 2018;10(5).
5. Szallasi A. Dietary Capsaicin: A Spicy Way to Improve Cardio-Metabolic Health? *Biomolecules*. 2022;12(12).
6. Deshpande J, Jeyakodi S, Juturu V. Tolerability of Capsaicinoids from Capsicum Extract in a Beadlet Form: A Pilot Study. *J Toxicol*. 2016;2016.
7. Han AL, Jeong SJ, Ryu MS, Yang HJ, Jeong DY, Park DS, et al. Anti-Obesity Effects of Traditional and Commercial Kochujang in Overweight and Obese Adults: A Randomized Controlled Trial. *Nutrients*. 2022;14(14).
8. Li Q, Cui Y, Jin R, Lang H, Yu H, Sun F, et al. Enjoyment of Spicy Flavor Enhances Central Salty-Taste Perception and Reduces Salt Intake and Blood Pressure. *Hypertension*. 2017;70(6):1291–9.
9. Ahuja KD, Robertson IK, Geraghty DP, Ball MJ. Effects of chili consumption on postprandial glucose, insulin, and energy metabolism. *The American journal of clinical nutrition*. 2006;84(1):63–9.
10. Arent SM, Walker AJ, Pellegrino JK, Sanders DJ, McFadden BA, Ziegenfuss TN, et al. The Combined Effects of Exercise, Diet, and a Multi-Ingredient Dietary Supplement on Body Composition and Adipokine Changes in Overweight Adults. *J Am Coll Nutr*. 2018;37(2):111–20.
11. Backonja M, Wallace MS, Blonsky ER, Cutler BJ, Malan Jr P, Rauck R, et al. NGX-4010, a high-concentration capsaicin patch, for the treatment of postherpetic neuralgia: a randomised, double-blind study. *The Lancet Neurology*. 2008;7(12):1106–12.
12. Belza A, Frandsen E, Kondrup J. Body fat loss achieved by stimulation of thermogenesis by a combination of bioactive food ingredients: a placebo-controlled, double-blind 8-week intervention in obese subjects. *International journal of obesity (2005)*. 2007;31(1):121–30.
13. Chaiyasit K, Khovidhunkit W, Wittayalertpanya S. Pharmacokinetic and the effect of capsaicin in *Capsicum frutescens* on decreasing plasma glucose level. *Journal of the Medical Association of Thailand = Chotmaihet thangphaet*. 2009;92(1):108–13.
14. de Freitas MC, Cholewa JM, Gobbo LA, de Oliveira J, Lira FS, Rossi FE. Acute Capsaicin Supplementation Improves 1,500-m Running Time-Trial Performance and Rate of Perceived Exertion in Physically Active Adults. *Journal of strength and conditioning research / National Strength & Conditioning Association*. 2018;32(2):572–7.

15. de Freitas MC, Cholewa JM, Freire RV, Carmo BA, Bottan J, Bratfich M, et al. Acute capsaicin supplementation improves resistance training performance in trained men. *Journal of Strength and Conditioning Research*. 2018;32(8):2227–32.
16. de Freitas MC, Cholewa JM, Gonçalves Panissa VL, Toloi GG, Netto HC, de Freitas CZ, et al. Acute Capsaicin Supplementation Improved Resistance Exercise Performance Performed after a High-Intensity Intermittent Running in Resistance-Trained Men. *Journal of Strength and Conditioning Research*. 2022;36(1):130–4.
17. de Moura e Silva VEL, Cholewa JM, Jäger R, Zanchi NE, de Freitas MC, de Moura RC, et al. Chronic capsiate supplementation increases fat-free mass and upper body strength but not the inflammatory response to resistance exercise in young untrained men: a randomized, placebo-controlled and double-blind study. *Journal of the International Society of Sports Nutrition*. 2021;18(1).
18. Dömötör A, Szolcsányi J, Mózsik G. Capsaicin and glucose absorption and utilization in healthy human subjects. *Eur J Pharmacol*. 2006;534(1-3):280–3.
19. Fuse S, Endo T, Tanaka R, Kuroiwa M, Ando A, Kume A, et al. Effects of Capsinoid Intake on Brown Adipose Tissue Vascular Density and Resting Energy Expenditure in Healthy, Middle-Aged Adults: A Randomized, Double-Blind, Placebo-Controlled Study. *Nutrients*. 2020;12(9).
20. Galgani JE, Ryan DH, Ravussin E. Effect of capsinoids on energy metabolism in human subjects. *The British journal of nutrition*. 2010;103(1):38–42.
21. Hochkogler CM, Lieder B, Rust P, Berry D, Meier SM, Pignitter M, et al. A 12-week intervention with nonivamide, a TRPV1 agonist, prevents a dietary-induced body fat gain and increases peripheral serotonin in moderately overweight subjects. *Molecular nutrition & food research*. 2017;61(5).
22. Hochkogler CM, Rohm B, Hojdar K, Pignitter M, Widder S, Ley JP, et al. The capsaicin analog nonivamide decreases total energy intake from a standardized breakfast and enhances plasma serotonin levels in moderately overweight men after administered in an oral glucose tolerance test: a randomized, crossover trial. *Molecular nutrition & food research*. 2014;58(6):1282–90.
23. Josse AR, Sherriffs SS, Holwerda AM, Andrews R, Staples AW, Phillips SM. Effects of capsinoid ingestion on energy expenditure and lipid oxidation at rest and during exercise. *Nutrition and Metabolism*. 2010;7.
24. Führer M, Vogelsang H, Hammer J. A placebo-controlled trial of an oral capsaicin load in patients with functional dyspepsia. *Neurogastroenterol Motil*. 2011;23(10):918–e397.
25. Kang C, Zhang Y, Zhu X, Liu K, Wang X, Chen M, et al. Healthy Subjects Differentially Respond to Dietary Capsaicin Correlating with Specific Gut Enterotypes. *J Clin Endocrinol Metab*. 2016;101(12):4681–9.
26. Matsumoto T, Miyawaki C, Ue H, Yuasa T, Miyatsuji A, Moritani T. Effects of capsaicin-containing yellow curry sauce on sympathetic nervous system activity and diet-induced thermogenesis in lean and obese young women. *J Nutr Sci Vitaminol (Tokyo)*. 2000;46(6):309–15.
27. Osuna-Prieto FJ, Milla-Martín D, Miras-Moreno S, Jurado-Fasoli L, Ramírez-Maldonado M, Soriano MA, et al. A single dose of dihydrocapsiate does not improve neuromuscular performance in resistance-trained young adults: A randomised, triple-blinded, placebo-controlled, crossover trial. *European journal of sport science*. 2023;23(12):2299–310.
28. Padilha CS, Billaut F, Figueiredo C, Panissa VLG, Rossi FE, Lira FS. Capsaicin Supplementation during High-intensity Continuous Exercise: A Double-blind Study. *Int J Sports Med*. 2020;41(14):1061–6.

29. Rashki M, Hemmatinafar M, Safari K, Imanian B, Rezaei R, Koushkie Jahromi M, et al. Capsaicin's Role in Mitigating Muscle Soreness and Enhancing Futsal Players' Recovery After Exercise-Induced Muscle Damage. *Nutrients*. 2025;17(5).
30. Rondanelli M, Opizzi A, Perna S, Faliva M, Solerte SB, Fioravanti M, et al. Improvement in insulin resistance and favourable changes in plasma inflammatory adipokines after weight loss associated with two months' consumption of a combination of bioactive food ingredients in overweight subjects. *Endocrine*. 2013;44(2):391–401.
31. Rossi PAQ, Lira FS, Bezerra VR, Clark NW, Fukuda DH, Panissa VLG. Acute Response to Capsiate Supplementation at Rest and during Exercise on Energy Intake, Appetite, Metabolism, and Autonomic Function: A Randomized Trial. *Journal of the American Nutrition Association*. 2022;41(6):541–50.
32. Salvio G, Petrelli M, Paolini S, Baldini V, Sbaffi C, Basili S, et al. Gender-specific effects of capsiate supplementation on body weight and bone mineral density: a randomized, double-blind, placebo-controlled study in slightly overweight women. *J Endocrinol Invest*. 2023;46(7):1415–22.
33. Taghizadeh M, Farzin N, Taheri S, Mahlouji M, Akbari H, Karamali F, et al. The Effect of Dietary Supplements Containing Green Tea, Capsaicin and Ginger Extracts on Weight Loss and Metabolic Profiles in Overweight Women: A Randomized Double-Blind Placebo-Controlled Clinical Trial. *Annals of nutrition & metabolism*. 2017;70(4):277–85.
34. Vogel RM, Joy JM, Falcone PH, Mosman MM, Kim MP, Moon JR. Consuming a multi-ingredient thermogenic supplement for 28 days is apparently safe in healthy adults. *Food and Nutrition Research*. 2015;59.
35. Yoshioka M, St-Pierre S, Drapeau V, Dionne I, Doucet E, Suzuki M, et al. Effects of red pepper on appetite and energy intake. *The British journal of nutrition*. 1999;82(2):115–23.
36. Rigamonti AE, Casnici C, Marelli O, De Col A, Tamini S, Lucchetti E, et al. Acute administration of capsaicin increases resting energy expenditure in young obese subjects without affecting energy intake, appetite, and circulating levels of orexigenic/anorexigenic peptides. *Nutrition research (New York, NY)*. 2018;52:71–9.
37. Kim Y, Park YJ, Yang SO, Kim SH, Hyun SH, Cho S, et al. Hypoxanthine levels in human urine serve as a screening indicator for the plasma total cholesterol and low-density lipoprotein modulation activities of fermented red pepper paste. *Nutrition research (New York, NY)*. 2010;30(7):455–61.
38. Kroff J, Hume DJ, Pienaar P, Tucker R, Lambert EV, Rae DE. The metabolic effects of a commercially available chicken peri-peri (African bird's eye chilli) meal in overweight individuals. *The British journal of nutrition*. 2017;117(5):635–44.
39. Lee TA, Li Z, Zerlin A, Heber D. Effects of dihydrocapsiate on adaptive and diet-induced thermogenesis with a high protein very low calorie diet: A randomized control trial. *Nutrition and Metabolism*. 2010;7.
40. Lejeune MP, Kovacs EM, Westerterp-Plantenga MS. Effect of capsaicin on substrate oxidation and weight maintenance after modest body-weight loss in human subjects. *The British journal of nutrition*. 2003;90(3):651–59.
41. Liao SF, Korivi M, Tsao JP, Huang CC, Chang CC, Cheng IS. Effect of Capsinoids Supplementation on Fat Oxidation and Muscle Glycogen Restoration During Post-exercise Recovery in Humans. *Curr Pharm Des*. 2021;27(7):981–8.
42. Lim JH, Jung ES, Choi EK, Jeong DY, Jo SW, Jin JH, et al. Supplementation with *Aspergillus oryzae*-fermented kochujang lowers serum cholesterol in subjects with hyperlipidemia. *Clinical nutrition (Edinburgh, Scotland)*. 2015;34(3):383–7.

43. Qin Y, Ran L, Wang J, Yu L, Lang HD, Wang XL, et al. Capsaicin Supplementation Improved Risk Factors of Coronary Heart Disease in Individuals with Low HDL-C Levels. *Nutrients*. 2017;9(9).
44. Rogers J, Urbina SL, Taylor LW, Wilborn CD, Purpura M, Jäger R, et al. Capsaicinoids supplementation decreases percent body fat and fat mass: Adjustment using covariates in a post hoc analysis. *BMC Obesity*. 2018;5(1).
45. Smeets AJ, Janssens PL, Westerterp-Plantenga MS. Addition of capsaicin and exchange of carbohydrate with protein counteract energy intake restriction effects on fullness and energy expenditure. *The Journal of nutrition*. 2013;143(4):442–7.
46. Smeets AJ, Westerterp-Plantenga MS. The acute effects of a lunch containing capsaicin on energy and substrate utilisation, hormones, and satiety. *Eur J Nutr*. 2009;48(4):229–34.
47. Snitker S, Fujishima Y, Shen H, Ott S, Pi-Sunyer X, Furuhashi Y, et al. Effects of novel capsinoid treatment on fatness and energy metabolism in humans: possible pharmacogenetic implications. *The American journal of clinical nutrition*. 2009;89(1):45–50.
48. Urbina SL, Roberts MD, Kephart WC, Villa KB, Santos EN, Olivencia AM, et al. Effects of twelve weeks of capsaicinoid supplementation on body composition, appetite and self-reported caloric intake in overweight individuals. *Appetite*. 2017;113:264–73.
49. Van Avesaat M, Troost FJ, Westerterp-Plantenga MS, Helyes Z, Le Roux CW, Dekker J, et al. Capsaicin-induced satiety is associated with gastrointestinal distress but not with the release of satiety hormones. *American Journal of Clinical Nutrition*. 2016;103(2):305–13.
50. Westerterp-Plantenga MS, Smeets A, Lejeune MPG. Sensory and gastrointestinal satiety effects of capsaicin on food intake. *International Journal of Obesity*. 2005;29(6):682–8.
51. Yokoyama K, Yamada Y, Akamatsu Y, Yoshinaka Y, Yamamoto A, Koizumi T, et al. Effects of Capsinoids on Daily Physical Activity, Body Composition and Cold Hypersensitivity in Middle-Aged and Older Adults: A Randomized Study. *Nutrients*. 2020;12(1).
52. Yoneshiro T, Aita S, Kawai Y, Iwanaga T, Saito M. Nonpungent capsaicin analogs (capsinoids) increase energy expenditure through the activation of brown adipose tissue in humans. *The American journal of clinical nutrition*. 2012;95(4):845–50.
