# Supplementary material
Source: Royal Society of Chemistry journal article supplement (doi:10.1039/d6fo00419a)

B) DBP

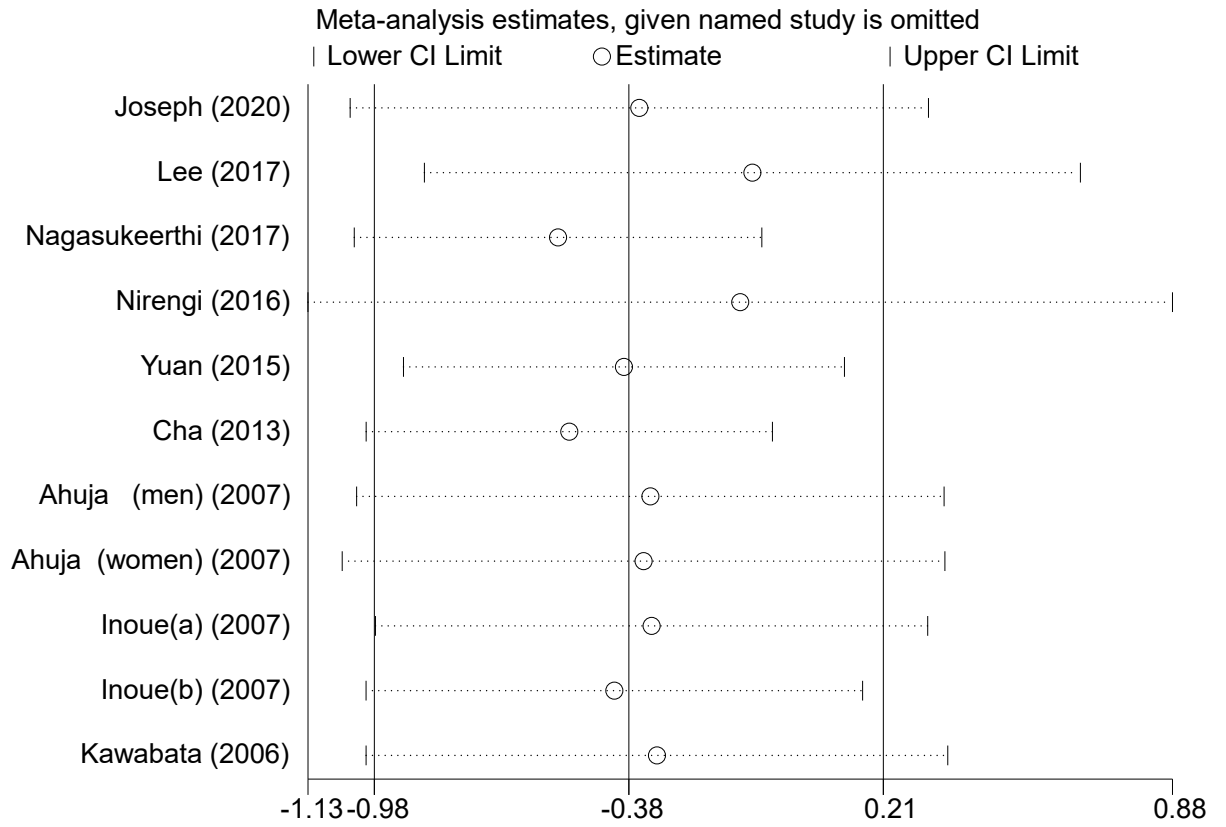

C) Heart (pulse ) rate (BPM)

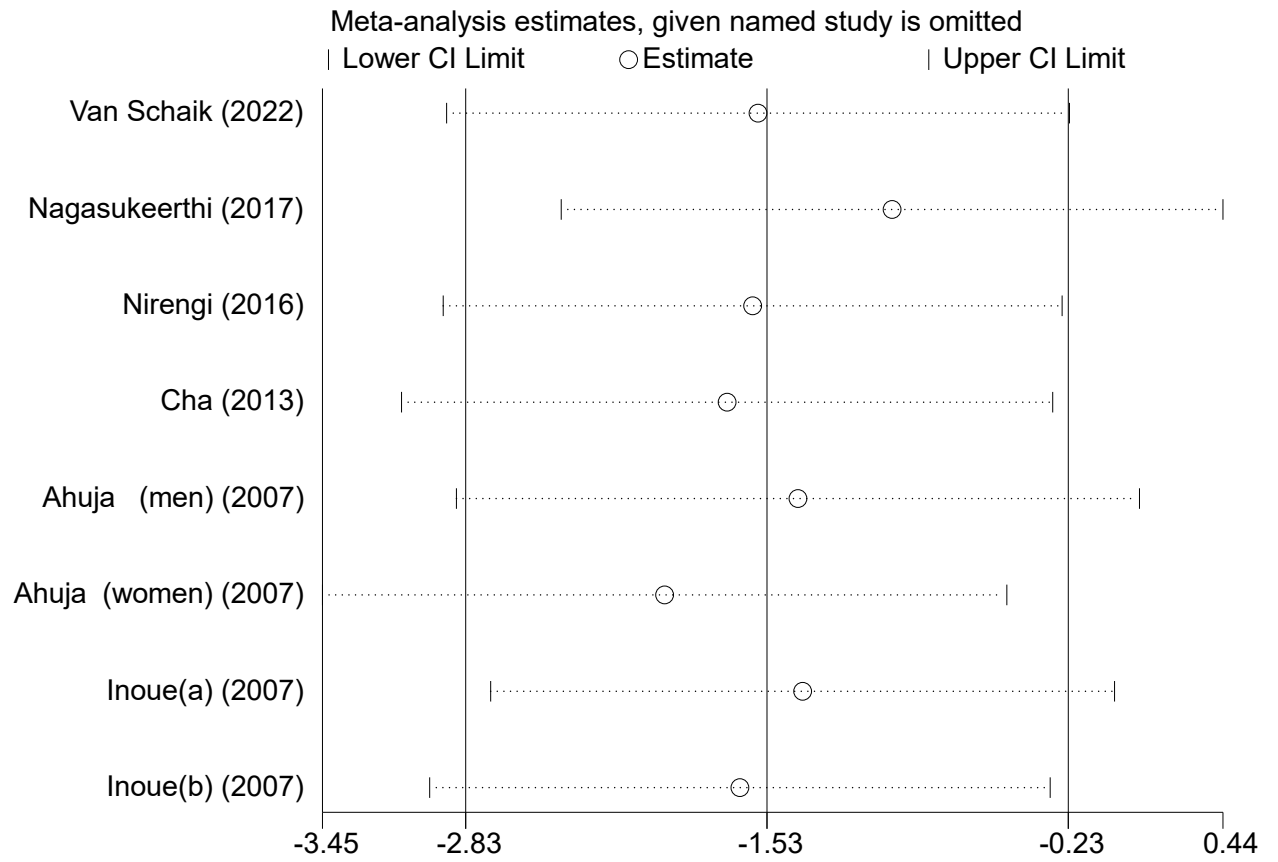

Supplement: d6fo00419a4.pdf [file d6fo00419a4.pdf]
